# Supplementary material for: Chloride corrosion behavior on heating pipeline made by AISI 304 and 316 in reclaimed water
Source: Royal Society of Chemistry journal article supplement (doi:10.1039/d1ra06695a), 2021-01-01
Supplement: d1ra06695a1.pdf [file d1ra06695a1.pdf]

1

## Supporting Information

### 2 Chloride corrosion behavior on heating pipeline made by AISI 304 and 3 316 in reclaimed water

4 Xi Chen,<sup>a</sup> Hongyan Liu,<sup>a</sup> Xiang Sun,<sup>a</sup> Botao Zan<sup>b</sup> and Meisheng Liang<sup>\*a</sup>

5 <sup>a</sup>College of Environmental Science and Engineering, Taiyuan University of Technology, Taiyuan, China.

6 <sup>b</sup>University of Washington, Seattle, 98105, WA, USA

7

8 07/12/2021, the ESI was first published 02/12/2021.

9 This version of the Electronic Supplementary Information replaces a previous copy in which the author order was  
10 incorrect.

#### 11 S1. The detailed for electrochemical test

12 In order to reach a stable state for the experimental system before potentiodynamic polarization tests and  
13 EIS measurements, the open circuit potential method was used to monitor the corrosion potential ( $E_{corr}$ ) of each  
14 sample for 30 min. Then EIS measurements were initially performed because its weak influence to working  
15 electrode, and the data were recorded using  $E_{corr}$  in a frequency range from  $10^5$  Hz to  $10^{-2}$  Hz with a sweeping  
16 frequency range of 12 points per decade frequency. After recording, EIS spectra were fitted by Z-view software.  
17 Finally, the potentiodynamic polarization tests with potential scan rate of  $0.0005 \text{ V s}^{-1}$  were carried out for  
18 analyzing the pitting corrosion susceptibility of working electrode, where the potential value was defined as the  
19 pitting potential ( $E_{pit}$ ).

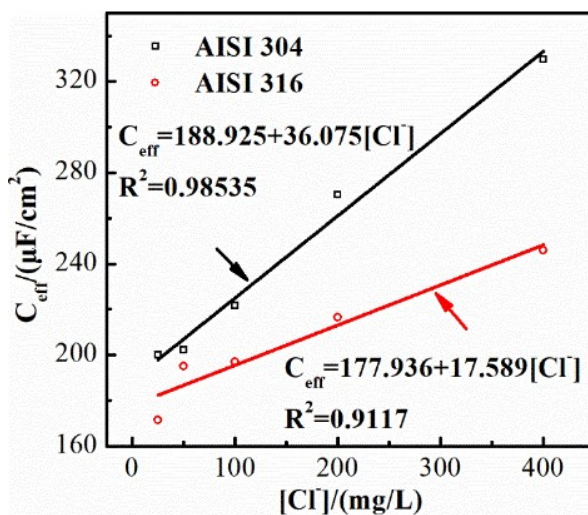

20

21 **Fig. S1** Calculated effective capacitance ( $C_{eff}$ ) of AISI 304 and AISI 316 at different chloride concentration.

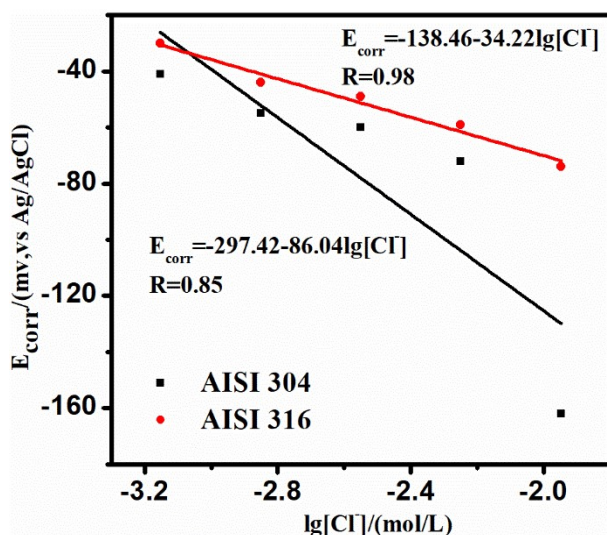

1

2

Fig. S2 Corrosion potential ( $E_{\text{Corr}}$ ) as a function of the  $\text{Cl}^-$  concentrations for AISI 304 and AISI 316.

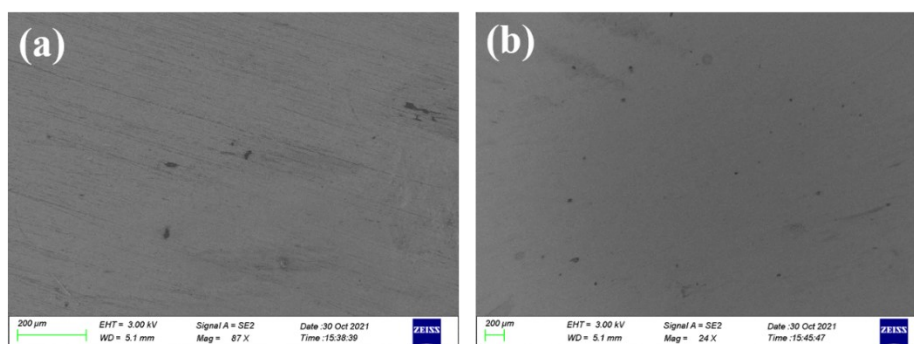

3

4

Fig. S3 SEM images of AISI 304 (a) and AISI 316 (b) after being corroded in 200 mg/L of  $\text{Cl}^-$ .

5

Table S1  $I_{\text{Corr}}$  and  $E_{\text{Corr}}$  data for AISI 304 and AISI 316 in potentiodynamic polarization test

| $\text{Cl}^-$ /(mg/L)                              | 25  | 50  | 100 | 200 | 400  |
|----------------------------------------------------|-----|-----|-----|-----|------|
| $I_{\text{Corr}}/304(\text{nA} \cdot \text{cm}^2)$ | -41 | -55 | -60 | -72 | -162 |
| $I_{\text{Corr}}/316(\text{nA} \cdot \text{cm}^2)$ | -30 | -44 | -49 | -59 | -74  |
| $E_{\text{Corr}}/304(\text{mV})$                   | 100 | 298 | 334 | 506 | 926  |
| $E_{\text{Corr}}/316(\text{mV})$                   | 60  | 162 | 284 | 395 | 595  |

6
